# Supplementary material for: Metastasis-associated in colon cancer-1 promotes vasculogenic mimicry in gastric cancer by upregulating TWIST1/2
Source: PubMed Central journal article supplement (PMC4484471; doi:10.18632/oncotarget.3416), 2015-03-20
Supplement: oncotarget-06-11492-s001.pdf [file oncotarget-06-11492-s001.pdf]

## SUPPLEMENTAL FIGURES AND TABLES

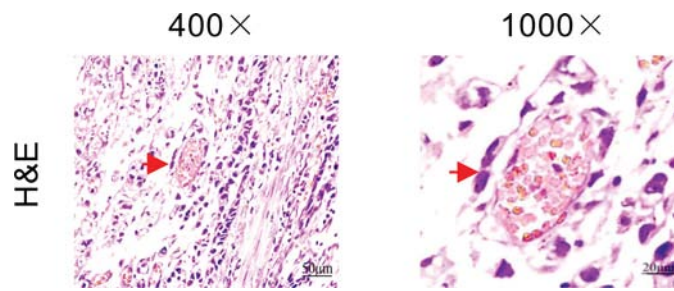

**Supplementary Figure S1: Representative pictures of vasculogenic mimicry (VM) structure confirmed by H&E staining.** Several red blood cells (red arrows) are surrounded by tumor cells.

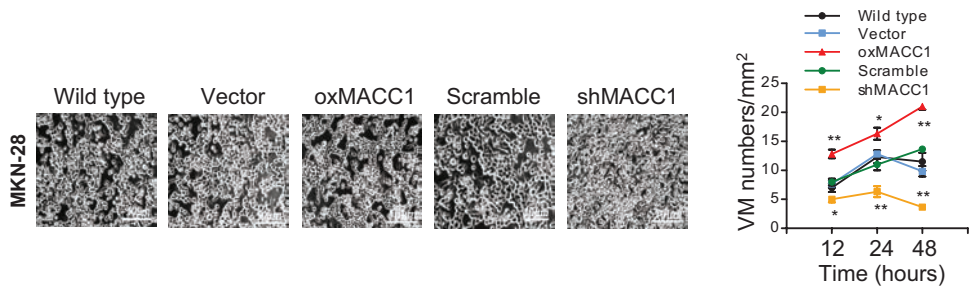

**Supplementary Figure S2: MACC1 promoted VM formation in MKN-28 GC cell line.** Representative VM images and quantitation of tube formation by MKN-28 GC cells cultured in 3D system for 48 hours. Scale bar = 50 µm. \* $p < 0.05$ ; \*\* $p < 0.01$ ,  $n = 3$  in each group.

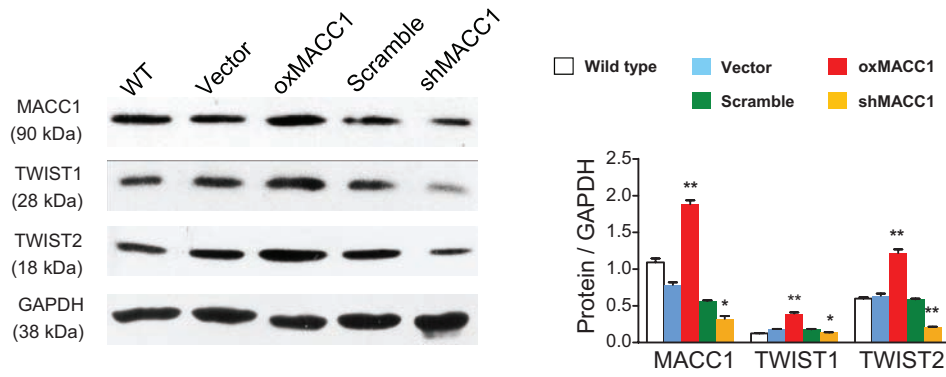

**Supplementary Figure S3: MACC1 upregulated TWIST1 and TWIST2 expression in MKN28 GC cell line.** Western blot analysis and quantitation of MACC1, TWIST1 and TWIST2 expression in response to overexpressing or silencing of MACC1 (oxMACC1 and shMACC1) in MKN-28 GC cell line. \* $p < 0.05$ ; \*\* $p < 0.01$ ,  $n = 3$ . WT, wild type. GAPDH was used as a loading control.

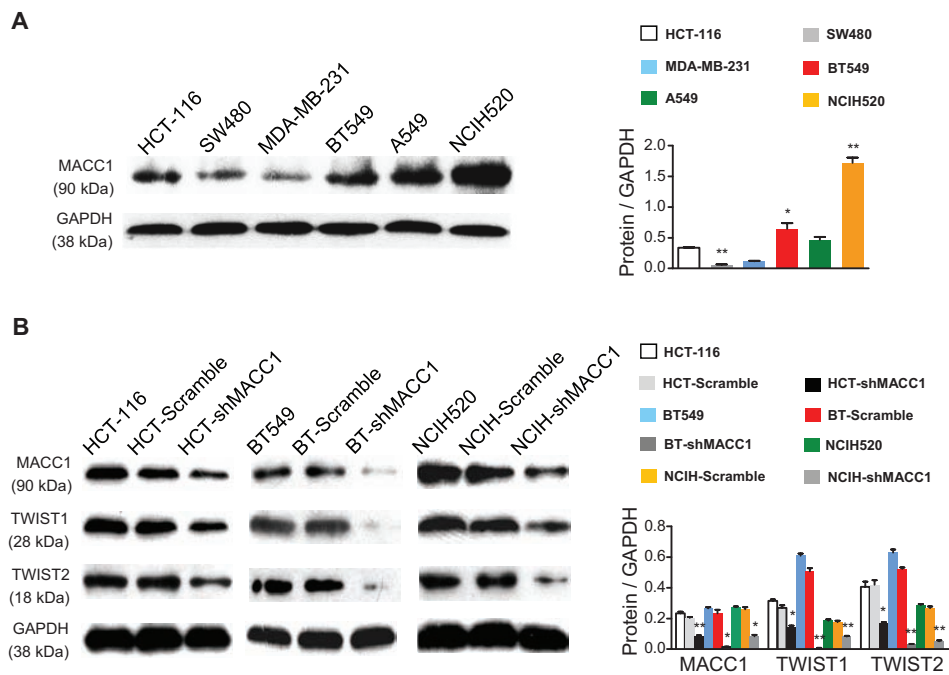

**Supplementary Figure S4: Silencing MACC1 downregulated TWIST1 and TWIST2 expression in colon cancer, breast cancer and lung cancer cell lines.** **A.** Western blot analysis and quantitation of MACC1 expression in colon cancer (HCT-116 and SW480), breast cancer (MDA-MB-231 and BT549) and lung cancer (A549 and NCIH520) cell lines. **B.** MACC1, TWIST1 and TWIST2 expressions were downregulated in response to silencing of MACC1 (shMACC1) in colon cancer, breast cancer and lung cancer cell lines. GAPDH was used as a loading control. \* $p < 0.05$ ; \*\* $p < 0.01$ ,  $n = 3$ .

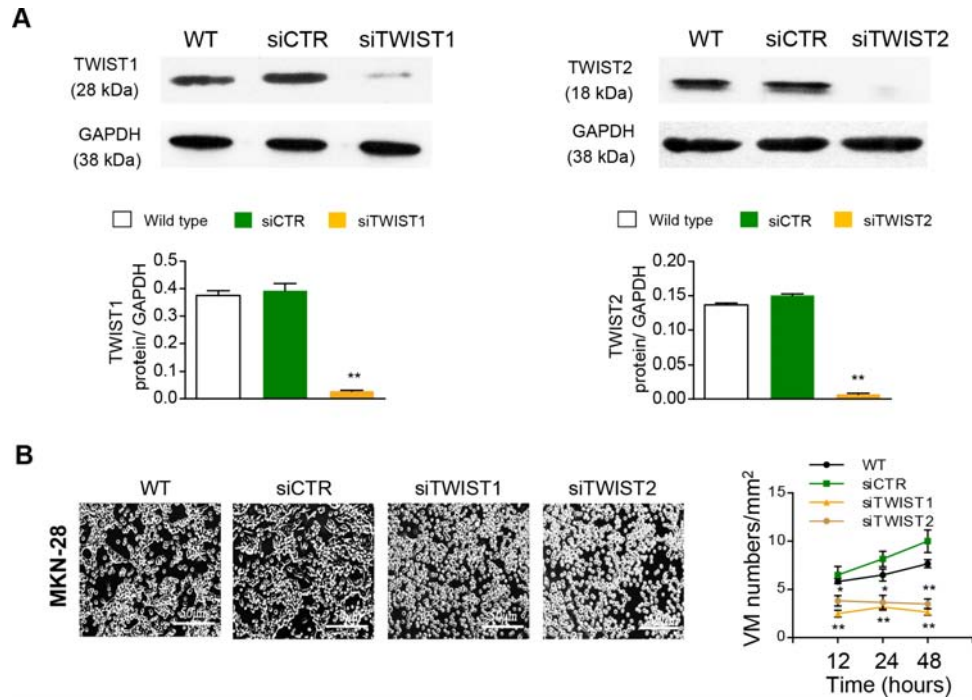

**Supplementary Figure S5: Silencing TWIST1/2 attenuated VM formation in MKN-28 GC cell line.** A. TWIST1 and TWIST2 proteins were silenced by corresponding siRNA sequences. B. Representative images of VM density (tube formation) at 48 hours of treatment and the time course quantitation of VM density in 3D cultures of MKN-28 cells treated with silenced TWIST1, TWIST2 or the siCTR control. \* $p < 0.05$ ; \*\* $p < 0.01$ ,  $n = 3$  in each group.

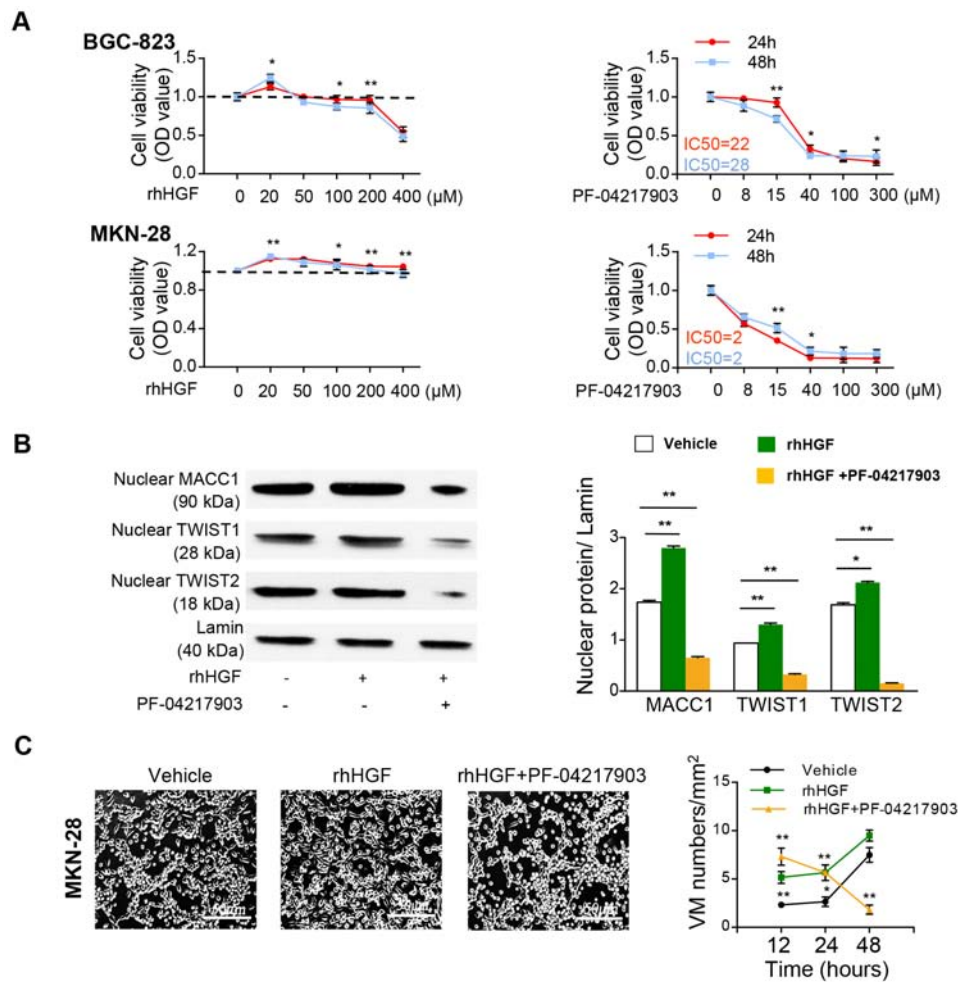

**Supplementary Figure S6: HGF/c-Met contributed to MACC1-induced VM formation in MKN-28 GC cell line.** **A.** MTT assays showed the maximal proliferation concentration of recombinant human hepatocyte growth factor (rhHGF) and the half maximal inhibitory concentration (IC<sub>50</sub>) of c-Met inhibitor PF-04217903 in BGC-823 and MKN-28 GC cell lines at 24 h and 48 h. **B.** Nuclear expression of TWIST1 and TWIST2 were upregulated by rhHGF, which were antagonized by co-treatment with PF-04217903. **C.** Representative pictures and time course effect of rhHGF, rhHGF+PF-04217903 or vehicle on the density of tube formation were taken 48 hours. Scale bar = 50 μm. \**p* < 0.05; \*\**p* < 0.01, *n* = 3. The concentrations for rhHGF and PF-04217903 were 20 μM and 2 μM, respectively.

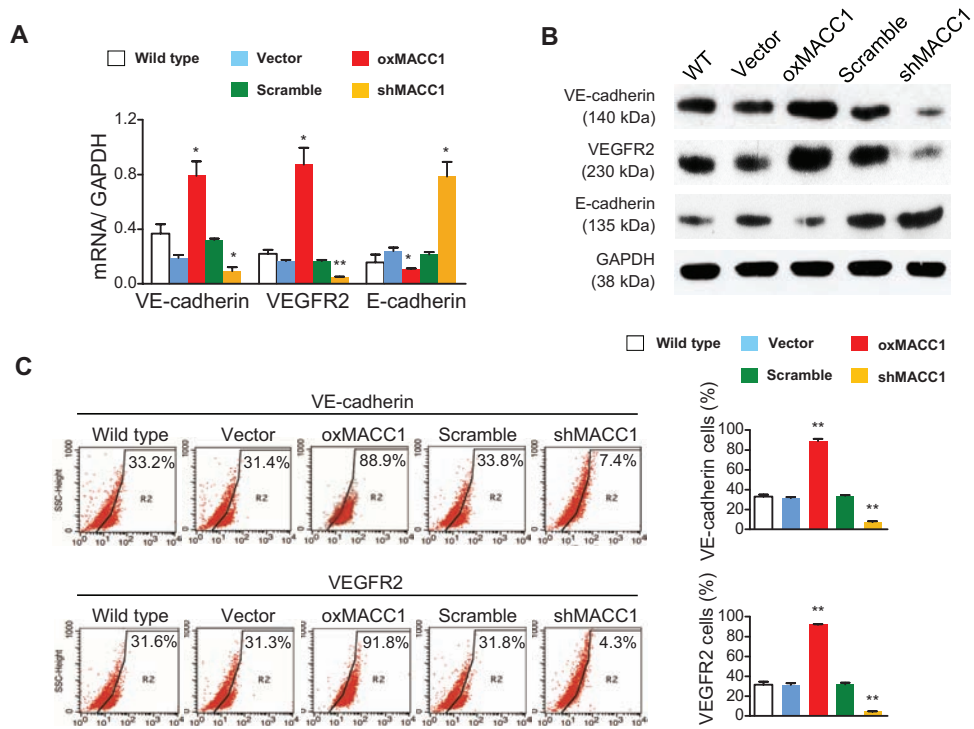

**Supplementary Figure S7: Effect of MACC1 on expression of VE-cadherin, VEGFR2 and E-cadherin.** MACC1-overexpressing (oxMACC1) or MACC1-silencing (shMACC1) changed the mRNA **A.** and protein expression **B.** of VE-cadherin, VEGFR2 and E-cadherin in MKN-28 cells. **C.** VE-cadherin and VEGFR2 expressions in MKN-28 cells were measured by flow cytometry. \* $p < 0.05$ ; \*\* $p < 0.01$ ,  $n = 3$  in each group.

**Supplementary Table S1. Correlation between VM and Clinicopathologic characteristics in 88 stage IV GC tissues**

| Characteristic                                  | n (%)      | VM density |            | $\chi^2$ | P value      |
|-------------------------------------------------|------------|------------|------------|----------|--------------|
|                                                 |            | High n (%) | Low n (%)  |          |              |
| <b>Survival in stage IV gastric cancer (GC)</b> |            |            |            |          |              |
|                                                 |            | 38 (43.2%) | 50 (56.8%) |          |              |
| Gender                                          |            |            |            | 0.452    | 0.501        |
| Male                                            | 52 (59.1%) | 24 (46.2%) | 28 (53.8%) |          |              |
| Female                                          | 36 (40.9%) | 14 (38.9%) | 22 (61.1%) |          |              |
| Age (years)                                     |            |            |            | 0.551    | 0.458        |
| $\geq 55$                                       | 40 (45.5%) | 19 (47.5%) | 21 (52.5%) |          |              |
| $< 55$                                          | 48 (54.5%) | 19 (39.6%) | 29 (60.4%) |          |              |
| Differentiation                                 |            |            |            | 5.602    | <b>0.018</b> |
| WD/MD                                           | 14 (15.9%) | 2 (14.3%)  | 12 (85.7%) |          |              |
| PD                                              | 74 (84.1%) | 36 (48.6%) | 38 (51.4%) |          |              |
| Depth of invasion                               |            |            |            | 0.074    | 0.786        |
| T1/T2/T3                                        | 15 (17.0%) | 6 (40.0%)  | 9 (60.0%)  |          |              |
| T4                                              | 73 (83.0%) | 32 (43.8%) | 41 (56.2%) |          |              |
| Lymph node metastasis                           |            |            |            | 0.114    | 0.735        |
| N0/N1/N2                                        | 8 (9.1%)   | 3 (37.5%)  | 5 (62.5%)  |          |              |
| N3                                              | 80 (90.9%) | 35 (43.7%) | 45 (56.3%) |          |              |
| Metastasis lesions                              |            |            |            | 5.029    | <b>0.025</b> |
| $< 3$                                           | 18 (20.5%) | 12 (66.7%) | 6 (6.8%)   |          |              |
| $\geq 3$                                        | 70 (79.5%) | 26 (37.1%) | 44 (62.9%) |          |              |

Abbreviations: WD, well differentiated; MD, moderately differentiated; PD, poorly differentiated



**Supplementary Table S2. Multivariate analysis of various prognosis parameters in 88 GC patients using Cox regression model**

| Covariates                      | <i>P</i> value    | HR<br>(Hazard ratio) | 95% CI for Exp (B) |       |
|---------------------------------|-------------------|----------------------|--------------------|-------|
|                                 |                   |                      | Lower              | Upper |
| Survival in stage IV GC         |                   |                      |                    |       |
| Gender (vs. Female)             | 0.341             | 0.758                | 0.429              | 1.340 |
| Age (vs. < 55 years)            | 0.814             | 0.480                | 0.357              | 1.378 |
| Differentiation (vs. PD)        | 0.628             | 1.185                | 0.596              | 2.357 |
| Depth of invasion (vs. T4)      | 0.769             | 0.906                | 0.470              | 1.746 |
| Lymph node metastasis (vs. N3)  | 0.535             | 0.759                | 0.318              | 1.814 |
| Metastasis lesions (vs. < 3)    | <b>0.009</b>      | 2.362                | 1.240              | 4.500 |
| VM density (vs. Low)            | <b>0.005</b>      | 2.371                | 1.290              | 4.359 |
| MACC1 expression (vs. Negative) | <b>&lt; 0.001</b> | 4.197                | 1.886              | 9.339 |

**Supplementary Table S3. Pearson correlation analysis between MACC1 and VM, VE-cadherin expression**

| Variant     | n (%)      | MACC1 expression |                | Pearson Correlation | P value           |
|-------------|------------|------------------|----------------|---------------------|-------------------|
|             |            | Positive n (%)   | Negative n (%) |                     |                   |
| VM density  |            |                  |                | 0.212               | <b>0.047</b>      |
| High        | 38 (43.2%) | 35 (92.1%)       | 3 (7.9%)       |                     |                   |
| Low         | 50 (56.8%) | 38 (76.0%)       | 12 (24.0%)     |                     |                   |
| VE-cadherin |            |                  |                | 0.487               | <b>&lt; 0.001</b> |
| Positive    | 65 (73.9%) | 61 (93.8%)       | 4 (6.2%)       |                     |                   |
| Negative    | 23 (26.1%) | 12 (52.2%)       | 11 (47.8%)     |                     |                   |

**Supplementary Table S4. Pearson correlation analysis between VM and VE-cadherin expression**

| Variant     | n (%)      | VM density |            | Pearson Correlation | P value      |
|-------------|------------|------------|------------|---------------------|--------------|
|             |            | High n (%) | Low n (%)  |                     |              |
| VE-cadherin |            |            |            | 0.258               | <b>0.015</b> |
| Positive    | 65 (73.9%) | 33 (50.8%) | 32 (49.2%) |                     |              |
| Negative    | 23 (26.1%) | 5 (21.7%)  | 18 (78.3%) |                     |              |

**Supplementary Table S5. Interference sequences for TWIST1 and TWIST2 silence**

| Gene name | Primer sequences (5' to 3') |
|-----------|-----------------------------|
| SiTWIST1  | F-CUCACGAGCGGCUCAGCUAdTdT   |
|           | R-UAGCUGACCCGCUCGUGAGdTdT   |
| SiTWIST2  | F-CCUUCUCCGUGUGGGCGCAUdTdT  |
|           | R-AUGCGCCACACGGAGAAGGdTdT   |
| SiCTR     | F-UUCUCCGAACGUGUCACGUTT     |
|           | R-ACGUGACACGUUCGGAGAATT     |

**Supplementary Table S6. List of proteins tested by antibodies and features of the corresponding antibodies**

| Protein     | Assay | Company     | Product number | Origin | Dilution | Incubation     |
|-------------|-------|-------------|----------------|--------|----------|----------------|
| MACC1       | WB    | Abcam       | AB-106579      | rpab   | 1/800    | overnight, 4°C |
| MACC1       | IHC   | Abnova      | PAB16755       | rpab   | 1/1000   | overnight, 4°C |
| CD31        | IHC   | Abcam       | AB-28364       | rpab   | 1/50     | overnight, 4°C |
| CK19        | IHC   | Proteintech | 10712-1-AP     | rpab   | 1/800    | overnight, 4°C |
| TWIST1      | WB    | Santa Cruz  | SC-15393       | rpab   | 1/800    | overnight, 4°C |
| TWIST1      | IHC   | Santa Cruz  | SC-15393       | rpab   | 1/50     | overnight, 4°C |
| TWIST2      | WB    | Abcam       | AB-66031       | rpab   | 1/1000   | overnight, 4°C |
| TWIST2      | IHC   | Abcam       | AB-66031       | rpab   | 1/50     | overnight, 4°C |
| VE-cadherin | WB    | CST         | #2500          | rpab   | 1/1000   | overnight, 4°C |
| VE-cadherin | FC    | CST         | #2500          | rpab   | 1/100    | overnight, 4°C |
| VE-cadherin | IHC   | CST         | #2500          | rpab   | 1/500    | overnight, 4°C |
| VEGFR2      | WB    | CST         | #9698          | rpab   | 1/1000   | overnight, 4°C |
| VEGFR2      | FC    | CST         | #9698          | rpab   | 1/400    | overnight, 4°C |
| E-cadherin  | WB    | CST         | #3195          | rpab   | 1/1000   | overnight, 4°C |

Abbreviations: CST, cell signaling technology; WB, western blot; IHC, immunohistochemistry; FC, flow cytometry; rpab, rabbit polyclonal antibody

**Supplementary Table S7. Primer sequences for TWIST1 and TWIST2 promoter**

| Promoter name | Primer sequences (5' to 3')                   |
|---------------|-----------------------------------------------|
| TWIST1- Luc   | F-CGGGGTACCCGTGCAGGCGGAAAGTTTGG               |
|               | R-CCCAAGCTTCAGAATACTGTAAATTCAGATTTACAAAAAGAAC |
| TWIST2- Luc   | F-CGACGCGTAAAGAGACAGAAAGGACAGAGAAAGAG         |
|               | R-CCGCTCGAGCTGGGCTGGGTTGCTAAATAGTTG           |

**Supplementary Table S8. Primer sequences for quantitative real-time PCR**

| Gene name   | Primer sequences (5' to 3') | Primer length (bps) | Amplified fragment length (bps) |
|-------------|-----------------------------|---------------------|---------------------------------|
| VE-cadherin | F-CCTGACTGTGGAGGCCAAAGA     | 21                  | 144                             |
|             | R-TTCTCACACACTTTGGGCTGGTAG  | 24                  |                                 |
| VEGFR2      | F-CCCTGGAGACCTGAGAACCA      | 20                  | 180                             |
|             | R-CCCGAGTGTAACCATAGCGG      | 20                  |                                 |
| E-cadherin  | F-GAGTGCCAACCTGGACCATTGAGTA | 24                  | 86                              |
|             | R-AGTCACCCACCTCTAAGGCCATC   | 23                  |                                 |
| GAPDH       | F-ACTTCAACAGCGACACCCACTC    | 22                  | 132                             |
|             | R-TACCAGGAAATGAGCTTGACAAAG  | 24                  |                                 |

Abbreviations: PCR, polymerase chain reaction
